# Supplementary material for: Nitric Oxide Implication in Potato Immunity to Phytophthora infestans via Modifications of Histone H3/H4 Methylation Patterns on Defense Genes
Source: MDPI journal article supplement (doi:10.3390/ijms23074051), 2022-04-06
Supplement: s1 [file s1]

**Supplementary Table S1.** List of designed primers

| Gene            | Sequence (5'→3')                |                                | Accession Number     | T <sub>m</sub> [°C] |
|-----------------|---------------------------------|--------------------------------|----------------------|---------------------|
|                 | Forward                         | Reverse                        |                      |                     |
| <i>EF</i>       | ATTGGAAACGGATATGCTCCA           | TCCTTACCTGAACGCCTGTCA          | AB061263             | 53                  |
| <i>18s rRNA</i> | GGGCATTTCGTATTTTCATAGTC<br>AGAG | CGGTTCTTGATTAATGAAAACAT<br>CCT | X67238               | 60                  |
| <i>CLF</i>      | TCCTCAGTGTGCTAGTCATGG           | ATGCTTCCTACCTGGCATCTG          | XM_006361673         | 54                  |
| <i>HSR203J</i>  | AGGAGCTTAAATTGCCGCCT            | TCCCACGCCGTTGTTTATCA           | PGSC0003DMG400021128 | 53                  |
| <i>NPRI</i>     | GCTGAACTTGGTCTACAAGG            | TCATCGAGAGTAGTATGCC            | PGSC0003DMG400010635 | 53                  |
| <i>Pitefl</i>   | ATGACTCGCCTCGGTGATTA            | TCCACACACACAAAGTGCATCA         | XM_0029 04671.1      | 60                  |
| <i>PRI</i>      | AAGACTATCTTGCGGTTAC             | TCTCCTGCACCTGAATGAA            | PGSC0003DMG400005110 | 54                  |
| <i>PRMT5</i>    | GGAACAACAACCCCTCGTCAC           | GGAAGACAATTCGGTGCATAAAT<br>AA  | PGSC0003DMG401003285 | 60                  |
| <i>R3a</i>      | AGCCAACTGGTGAGATTAGT            | ATCCTGTACCCACAATTTGC           | PGSC0003DMG400009455 | 53                  |
| <i>TrxG</i>     | CAACTTGCGTGTTATTGTGG            | ATACAGCTTTGCCATTTCGTT          | XR_368704            | 53                  |
| <i>WRKYI</i>    | TTTCTTCAGCATCATCGTC             | TTCCATGCTTGCCATTAGTC           | PGSC0003DMT400056725 | 54                  |

**Supplementary Table S2.** List of designed primers for ChIP-qPCR (promotor sequence) analyses

| Gene           | Sequence (5'→3')                                          |                                                             | Accession Number         | T <sub>m</sub><br>[°C] | Promotor region sequence +500bp                                                                                                                                                                                                                                                                                                                                                                                                                                                                                                                                           |
|----------------|-----------------------------------------------------------|-------------------------------------------------------------|--------------------------|------------------------|---------------------------------------------------------------------------------------------------------------------------------------------------------------------------------------------------------------------------------------------------------------------------------------------------------------------------------------------------------------------------------------------------------------------------------------------------------------------------------------------------------------------------------------------------------------------------|
|                | Forward                                                   | Reverse                                                     |                          |                        |                                                                                                                                                                                                                                                                                                                                                                                                                                                                                                                                                                           |
| <i>HSR203J</i> | AGGAGCT<br>TAAATTG<br>CCGCCT<br><br>Start: 40<br>Stop: 61 | TCCCACG<br>CCGTTGT<br>TTATCA<br><br>Start: 135<br>Stop: 114 | PGSC0003DMG4000<br>21128 | 56                     | gaagatacaaagagttttacaaaaatttgactttagatagtggaagagtaaaggcatt<br><br>gacagatcattttctacacaatttcctaagtggtcattccacttatagatttcgtcca<br><br>catttacaactggaatataagaaagactttgttaagatccaaataataggacgttataa<br><br>cgagagtactctctctgtccaacaatactattttaatgtattaaaaatagttgttaat<br><br>gatacgtgttactttatgaagttcattgataattttacacttacttctaatttactct<br><br>tatcattaattatagacattttctcattatattttcaagatattttattattatatt<br><br>aaagggtgatatgataaaattatccttctatttatagtttcttaaagggtgtgtgatgtg<br><br>ttaagtcaataatggataaattagataatacagaaaaatattctaagagaatcataattt<br><br>ttttatatgattttaatcact |
| <i>NPRI</i>    | GCTGAAC<br>TTGGTCT<br>ACAAGG<br><br>Start: 52<br>Stop: 74 | TCATCGA<br>GAGTAGT<br>ATGCC<br><br>Start: 148<br>Stop: 129  | PGSC0003DMG4000<br>10635 | 55                     | tcacattatttgtaatttcattaattgtatcctctttttctctagtttgctatgcct<br><br>tttatgtgagtcgaagatctatcgaaaataacatctctatttcataagataaaaaataagg<br><br>ttgcgtataactactctcctcgcacccattttgtgaagtcacactgaatatgcatgtgt<br><br>tcaaatagtaactaaaacaaataaaataaaatagagagtatggaagtcaataattagtaa<br><br>tcgtgctatttaatttctctttccatattattgttggtgctgctgatattttctatcgt<br><br>gtttccttttatttttatctgagccaagagtatatcgaaaatattctctcttaacttc                                                                                                                                                                |

|            |                                                                       |                                                                      |                          |    |                                                                                                                                                                                                                                                                                                                                                                                                                                                                                                                                                                                  |
|------------|-----------------------------------------------------------------------|----------------------------------------------------------------------|--------------------------|----|----------------------------------------------------------------------------------------------------------------------------------------------------------------------------------------------------------------------------------------------------------------------------------------------------------------------------------------------------------------------------------------------------------------------------------------------------------------------------------------------------------------------------------------------------------------------------------|
|            |                                                                       |                                                                      |                          |    | <p>aaataagactgcatacatcactctttcaagatctcactcgtgtaatttcattaaatat</p> <p>gttattgttacttatattccctttttctttgttaatacctcagccgccagaagaac</p> <p>catccatattgctccaccctc</p>                                                                                                                                                                                                                                                                                                                                                                                                                   |
| <i>PRI</i> | <p>AAGACTA<br/>TCTTGCG<br/>GTTTAC</p> <p>Start: 119<br/>Stop: 139</p> | <p>TCTCCTG<br/>CACCTGA<br/>ATGAA</p> <p>Start: 192<br/>Stop: 170</p> | PGSC0003DMG4000<br>05110 | 57 | <p>gacttgactcagaaaacatagaggatcatttaacaatataaaaacttttaaaaaaa</p> <p>gaacaaattaaattgctcgaatattgttactagtagtagtatatctgtggttaaaatt</p> <p>tctgcagaaggcagaacaaaatttaattgtccaatcaattatatattctcaccaaatcc</p> <p>tacgtttcatcttctttcattaattatatagtactcctagtaacggataatagtaatgg</p> <p>taattagggagtcaatatatatagtgaaacatcaaaaataaagaaatgttacgttataga</p> <p>tattcatcaaacttaagaacgatttatttactatagtttttttttttgctattcaa</p> <p>aattggctaaaaatttgccaattaaaagctagtaaccgttcaattaataattcttttac</p> <p>aacttgcaaaacttttaaaactcagcattcttatttcttcctattaaaatttaaaacccat</p> <p>ctatgttctcattaaaactca</p> |

|              |                                                             |                                                             |                          |    |                                                                                                                                                                                                                                                                                                                                                                                                                                                                                                                                                                                      |
|--------------|-------------------------------------------------------------|-------------------------------------------------------------|--------------------------|----|--------------------------------------------------------------------------------------------------------------------------------------------------------------------------------------------------------------------------------------------------------------------------------------------------------------------------------------------------------------------------------------------------------------------------------------------------------------------------------------------------------------------------------------------------------------------------------------|
| <i>R3a</i>   | AGCCAAC<br>TGGTGAG<br>ATTAGT<br><br>Start: 240<br>Stop: 260 | ATCCTGT<br>ACCCACA<br>ATTTGC<br><br>Start: 382<br>Stop: 363 | PGSC0003DMG4000<br>09455 | 56 | ttctgaaatctgcaaagcaaacacaaaatgattttaagaaatttgagaagatgaatgtt<br><br>tctatcttcaattactaacaactttactttacctgttgaatgctaagagtaatttgcaaa<br><br>caagaatgatcactgatttctctctcttttgctagtaaatttgcaaacaacaagttgt<br><br>aactatgtttgctagtgcctattcattgctttctcaattgagtaattgagggtagtggg<br><br>ggacgttgacaaaatggggaccatttagacaccaaagtcttgatcatttaaacatcaa<br><br>tacaagggtcaattgtgctattttgacatttttgctaatcagccaaatcgttaaagt<br><br>gtgcaacacactcgcggataacatctcaatatttgcaaaaatgacaaaattact<br><br>tccatattgaattgcacaaattactttcctggggtgttgacaattaatgagtcctgtt<br><br>ttaaggctttagtccttatt                  |
| <i>WRKY1</i> | TTTCTTC<br>AGCATCA<br>TCGTC<br><br>Start: 122<br>Stop: 141  | TTCCATG<br>CTTGCCA<br>TTAGTC<br><br>Start: 236<br>Stop: 218 | PGSC0003DMT4000<br>56725 | 57 | ttttttgagagatgaaacggaaagaggtatataaaaggttgagatgaagactaaaaaaaa<br><br>aaaagtggtgcaaaagagaagattttgataaaataaacgtaagggtggtgcgtcaaggg<br><br>tgggcaagtgggaccaagtataaaaaattgtcaagactgagattgacttgttcgcattaa<br><br>agtaaagagaaaagagaagaagaagaagatgaaaccaccggcccgactagtaaggcgtg<br><br>atgaaaatgaaaatgaaaaggtagctagtagtgacaacaaagtcaactagttttaagcac<br><br>aaatttctcgcctcacttacgacttgggtattagctaattcatccaccgttcaattta<br><br>tataaattagtttaaattcatataaaattttagaaggaaataatgatttttcaaatttat<br><br>agtctgaaataaataatcccaaaaaatgtaataaataaataaaatattaccacccaccc<br><br>ctaccatcnnnnnnnnnnnnnnnnn |

**Supplementary Table S3.** Structure of arginine methyltransferase 5 (PRMT5) inhibitor and the effect of potato leaf treatment with GSK3326595

| Name                                                              | Chemical Structure                                                                | No symptoms of cytotoxicity<br>(72 h after the treatment)                                                                                   |
|-------------------------------------------------------------------|-----------------------------------------------------------------------------------|---------------------------------------------------------------------------------------------------------------------------------------------|
| <p>GSK3326595<br/>(EPZ015938)</p> <p>CAS No.<br/>1616392-22-3</p> | 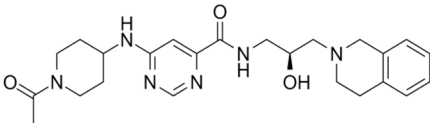 |  <p>(-) inhibitor                      (+) inhibitor</p> |
